# Supplementary material
Source: PubMed Central journal article supplement (PMC3613864)
Supplement: NIHMS394357-supplement-Table_S1.pdf [file NIHMS394357-supplement-Table_S1.pdf]

| Compound Name              | EC50 (μM) | SMILES                                                                                                            | Structure                                                                             |
|----------------------------|-----------|-------------------------------------------------------------------------------------------------------------------|---------------------------------------------------------------------------------------|
| NP-006299                  | 3.00      | <chem>CN1Cc2c3OCOC3ccc2[C@H]4[C@@H](O)Cc5cc6OCc6cc5[C@H]41</chem>                                                 | 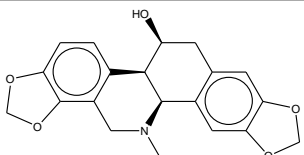   |
| Dimethyl fasudil           | 3.30      | <chem>C[C@@H]1CNCCCN1S(=O)(=O)c2cccc3cncc(C)c23</chem>                                                            |    |
| 5,8,11-EICOSATRIYNOIC ACID | 3.50      | <chem>CCCCCCCCC#CCC#CCC#CCCCC(=O)O</chem>                                                                         |    |
| 356130;WT-III-101-II_XG02  | 3.61      | <chem>COc1cc(/C=N/NC(=O)c2cccnc2)ccc1O</chem>                                                                     |    |
| SU6656                     | 3.86      | <chem>CN(C)S(=O)(=O)c1ccc2NC(=O)/C(=C/c3cc4CCCCc4[nH]3)/c2c1</chem>                                               |   |
| NP-010771                  | 4.00      | <chem>O[C@H]([C@H]1C[C@@H]2CCN1C[C@@H]2C=C)c3cnc4cccc34</chem>                                                    |  |
| SB 225002                  | 4.00      | <chem>Oc1cc(ccc1NC(=O)Nc2cccnc2Br)[N+](=O)[O-]</chem>                                                             |  |
| 2-Methoxy-Estradiol        | 4.79      | <chem>COc1cc2C3CC[C@]4(C)[C@@H](O)CCC4C3CCc2cc1O</chem>                                                           |  |
| 2,5-dihydroxycinnamic acid | 5.00      | <chem>COC(=O)/C=C/c1cc(O)ccc1O</chem>                                                                             |  |
| NP-003964                  | 5.30      | <chem>CC(C)(O)CCC(=O)[C@](C)(O)C1[C@H](O)C[C@@]2(C)C3CC=C4C(C[C@H](O)[C@@H](O)C4(C)C)[C@]3(C)C(=O)C[C@]12C</chem> |  |

| Compound Name                               | EC50 (μM) | SMILES                                                                                                         | Structure                                                                             |
|---------------------------------------------|-----------|----------------------------------------------------------------------------------------------------------------|---------------------------------------------------------------------------------------|
| Indanocine                                  | 5.40      | <chem>COc1cc2C/C(=C\c3cc(C)c(O)c(C)c3)/C(=O)c2c(N)c1O</chem>                                                   | 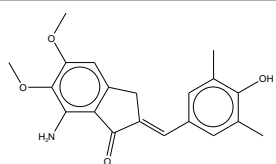   |
| DEOXSAPPANONE B 7,3'-DIMETHYL ETHER ACETATE | 5.60      | <chem>COc1ccc2C(=O)C(Cc3ccc(OC)c(OC(=O)C)c3)COc2c1</chem>                                                      |     |
| Simvastatin                                 | 5.84      | <chem>CCC(C)(C)C(=O)O[C@H]1C[C@@H](C)C=C2C=C[C@H](C)[C@H](CC[C@H]3C[C@@H](O)CC(=O)O3)[C@@H]12</chem>           |    |
| NP-009507                                   | 6.00      | <chem>COc1cc(ccc1O)c2oc3cc(O)c(OC)c(O)c3c(=O)c2OC</chem>                                                       |    |
| DEOXSAPPANONE B 7,4'-DIMETHYL ETHER         | 6.10      | <chem>COc1ccc2C(=O)C(Cc3ccc(OC)c(O)c3)COc2c1</chem>                                                            |    |
| Cdk1 Inhibitor                              | 7.20      | <chem>Clc1[nH]c2ccccc2c1/C=C\3/C(=O)Nc4ccccc4</chem>                                                           |  |
| 379572                                      | 7.35      | <chem>CN(C)CCCNC(=O)[C@H]1[C@@H](N(Cc2cc(cc2)C(F)(F)F)C(F)(F)F)C(=O)c3ccc13)c4ccc(COC(=O)NCCC(=O)NO)cc4</chem> |  |
| Prazosin hydrochloride                      | 7.80      | <chem>COc1cc2nc(nc(N)c2cc1OC)N3CCN(CC3)C(=O)c4ccc(O)4</chem>                                                   |  |
| RLM 2-67                                    | 8.26      | <chem>Nc1cccc1NC(=O)c2ccc(CNc3nccc(n3)c4cccnc4)cc2</chem>                                                      |  |
| 324803                                      | 8.70      | <chem>Cc1ccc(S[C@@]2(CC(=O)N(Cc3ccccc3Cl)[C@@H]2c4ccc(CO)cc4)C(=O)NCCN5CCOCC5)cc1</chem>                       |  |

| Compound Name                 | EC50 (μM) | SMILES                                                                                                                                                                           | Structure                                                                             |
|-------------------------------|-----------|----------------------------------------------------------------------------------------------------------------------------------------------------------------------------------|---------------------------------------------------------------------------------------|
| 324818                        | 8.80      | <chem>CN(C)CCCNC(=O)[C@]1(C)C(=O)N(Cc2ccccc2C(F)(F)F)[C@@H]1c3ccc(CO)cc3)Sc4ccc(C)cc4</chem>                                                                                     | 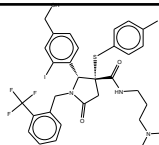   |
| Latruculin B                  | 8.82      | <chem>C[C@H]/1CC[C@@H]2C[C@H](C[C@@](O)(O2)[C@@H]3CSC(=O)N3)OC(=O)\C=C(C)/CC/C=C1</chem>                                                                                         |    |
| Aminopurvalanol A             | 8.83      | <chem>CC(C)[C@H](CO)Nc1nc(Nc2cc(N)cc(Cl)c2)c3ncn(C(C)C)c3n1</chem>                                                                                                               |    |
| ascomycin (FK-520)            | 8.87      | <chem>CC[C@@H]1C=C(C)C[C@H](C)C[C@H](OC)[C@H]2O[C@](O)([C@H](C)C[C@@H]2OC)C(=O)C(=O)N3CCCC[C@H]3C(=O)O[C@@H]([C@H](C)[C@@H](O)C1=O)/C=C/[C@@H]4CC[C@@H](O)[C@@H](C4)OC)/C</chem> |     |
| 379505                        | 10.00     | <chem>ONC(=O)CCCCNC(=O)OCCCOc1ccc(cc1)C2=N[C@]3(CCS(=O)(=O)c4ccccc4)[C@H](O2)c5ccccc5CN(Cc6ccccc6)C3=O</chem>                                                                    |    |
| Lovastatin                    | 10.66     | <chem>CC[C@H](C)C(=O)O[C@H]1C[C@@H](C)C=C2C=C[C@H](C)[C@H](CC[C@@H]3C[C@@H](O)CC(=O)O3)[C@@H]12</chem>                                                                           |  |
| Retinoic acid                 | 10.68     | <chem>C/C(=C\C=C\C=C\C=C(=O)O)/C=C/C1=C(C)CCCC1(C)C</chem>                                                                                                                       |  |
| Triflupromazine hydrochloride | 10.90     | <chem>CN(C)CCCN1c2ccccc2Sc3ccc(cc13)C(F)(F)F</chem>                                                                                                                              |  |
| Azacytidine-5                 | 11.15     | <chem>Nc1ncn(C2O[C@H](CO)[C@@H](O)[C@H]2O)c(=O)n1</chem>                                                                                                                         |  |
| Triamterene                   | 12.30     | <chem>Nc1nc(N)c2nc(c(N)nc2n1)c3ccccc3</chem>                                                                                                                                     |  |

| Compound Name           | EC50 (μM) | SMILES                                                                                                                                                                         | Structure |
|-------------------------|-----------|--------------------------------------------------------------------------------------------------------------------------------------------------------------------------------|-----------|
| Fluvastatin sodium salt | 13.54     | <chem>CC(C)n1c(/C=C/[C@H](O)C[C@H](O)CC(=O)O)c(c2cc(F)cc2)c3ccccc13</chem>                                                                                                     |           |
| CANTHARIDIN             | 14.83     | <chem>C[C@]12C3CCC(O3)[C@]2(C)C(=O)OC1=O</chem>                                                                                                                                |           |
| 324798                  | 14.98     | <chem>CN(C)CCCNC(=O)[C@]1(C)C(=O)N(C2Cc3ccccc3C2)[C@@H]1c4ccc(CO)cc4)Sc5ccc(C)cc5</chem>                                                                                       |           |
| rutaecarpine            | 14.99     | <chem>O=c1n2CCc3c([nH]c4ccccc34)-c2nc5ccccc15</chem>                                                                                                                           |           |
| Monensin sodium salt    | 15.13     | <chem>CC[C@]1(CC[C@@H](O1)[C@]2(C)CC[C@]3(C[C@H](O)[C@@H](C)[C@H](O3)[C@@H](C)[C@@H](OC)[C@@H](C)C(=O)O)O2)[C@@H]4O[C@H](C[C@@H]4C)[C@H]5O[C@@](O)(CO)[C@H](C)C[C@@H]5C</chem> |           |
| Lasalocid sodium salt   | 15.29     | <chem>CC[C@H]([C@H]1O[C@@](CC)(C[C@@H]1C)[C@H]2CC[C@](O)(CC)[C@H](C)O2)C(=O)[C@@H](C)[C@@H](O)[C@H](C)CCc3ccc(C)c(O)c3C(=O)O</chem>                                            |           |
| Scoulerine              | 15.52     | <chem>COc1ccc2C[C@@H]3N(CCc4cc(OC)c(O)cc34)Cc2c1O</chem>                                                                                                                       |           |
| GW8510                  | 15.67     | <chem>CN(C)c1cc2c(Nc3ccc4n(Cc5ccccc5)ncc4c3)ncnc2cn1</chem>                                                                                                                    |           |
| 324833                  | 15.74     | <chem>Cc1ccc(S[C@@]2(CC(=O)N(Cc3ccccc3)[C@@H]2c4cc(CO)cc4)C(=O)NCCN5C(COCC5)cc1</chem>                                                                                         |           |
| SU9516                  | 16.39     | <chem>COc1ccc2NC(=O)/C(=C\c3c[nH]cn3)/c2c1</chem>                                                                                                                              |           |

| Compound Name            | EC50 (μM) | SMILES                                                                | Structure |
|--------------------------|-----------|-----------------------------------------------------------------------|-----------|
| 355966;WT-III-101-I_XF03 | 16.68     | <chem>OC[C@@H](O)[C@H](O)[C@H](O)[C@@H](O)/C=N/NC(=O)c1ccccc1O</chem> |           |
| NP-003918                | 16.87     | <chem>CC(=C)C(=O)OC1CC(CO)CCCC(=CC2OC(=O)C(=C)C21)CO</chem>           |           |
| 355939;WT-III-101-I_XB10 | 17.07     | <chem>Oc1ccccc1C(=O)N/N=C/CC=C</chem>                                 |           |
| 355843;WT-III-101-I_A03  | 17.12     | <chem>COc1ccc(/C=N/NC(=O)c2ccc(O)c(O)c2)cc1</chem>                    |           |
| 355871;WT-III-101-I_D01  | 17.29     | <chem>Oc1ccccc1C(=O)N/N=C/c2ccc(O)c(Cl)c2</chem>                      |           |
| IRIGENIN, 7-BENZYL ETHER | 17.34     | <chem>COc1cc(cc(O)c1OC)c2ccc3cc(OCc4ccccc4)c(OC)c(O)c3c2=O</chem>     |           |
| DIHYDROROBINETIN         | 17.75     | <chem>O[C@@H]1[C@H](Oc2cc(O)ccc2C1=O)c3cc(O)c(O)c(O)c3</chem>         |           |
| 372504                   | 17.97     | <chem>OCc1ccc(CO[C@H]2C[C@H](C=C(O2)C(=O)NC3CC3)C4CC4)cc1</chem>      |           |
| dipyridamole             | 18.98     | <chem>OCCN(CCO)c1nc(N2CCCC2)c3nc(nc(N4CCCC4)c3n1)N(CCO)CCO</chem>     |           |
| harmine                  | 20.88     | <chem>COc1ccc2c(c1)[nH]c3c(C)nccc23</chem>                            |           |

| Compound Name            | EC50 (μM) | SMILES                                                         | Structure |
|--------------------------|-----------|----------------------------------------------------------------|-----------|
| 355964;WT-III-101-I_XF01 | 23.79     | <chem>OC[C@@H](O)[C@@H](O)[C@H](O)/C=N/NC(=O)c1ccccc1O</chem>  |           |
| 355974;WT-III-101-I_XG02 | 25.50     | <chem>COc1cc(/C=N/NC(=O)c2ccc(O)cc2O)ccc1O</chem>              |           |
| 355896;WT-III-101-I_F07  | 25.63     | <chem>Oc1ccccc1C(=O)N/N=C/c2cc(Br)cs2</chem>                   |           |
| 355856;WT-III-101-I_B05  | 25.76     | <chem>COc1ccc(Br)c(/C=N/NC(=O)c2ccccc2O)c1</chem>              |           |
| ABT-702                  | 25.98     | <chem>Nc1ncnc2nc(cc3cccc(Br)c3)c12c4ccc(nc4)N5CCOC5</chem>     |           |
| 355965;WT-III-101-I_XF02 | 26.07     | <chem>C[C@@H](O)[C@@H](O)[C@@H](O)C/C=N/NC(=O)c1ccccc1O</chem> |           |
| 355899;WT-III-101-I_F11  | 26.57     | <chem>Oc1ccccc1C(=O)N/N=C/c2cc(F)cc2</chem>                    |           |
| 355842;WT-III-101-I_A02  | 26.89     | <chem>Oc1ccccc1C(=O)N/N=C/c2ccc(O)cc2OCC=C</chem>              |           |
| 355877;WT-III-101-I_D08  | 26.97     | <chem>Oc1ccccc1C(=O)N/N=C/C2CCCCC2</chem>                      |           |
| Indolactam V             | 27.53     | <chem>CC(C)[C@@H]1N(C)c2ccc3[nH]cc(C[C@@H](CO)N1C=O)c23</chem> |           |

| Compound Name           | EC50 (μM) | SMILES                                                                                                       | Structure                                                                             |
|-------------------------|-----------|--------------------------------------------------------------------------------------------------------------|---------------------------------------------------------------------------------------|
| 355904;WT-III-101-I_G06 | 27.55     | <chem>CC(C)(C)OC(=O)Nc1ccc(/C=N/NC(=O)c2ccccc2O)cc1</chem>                                                   | 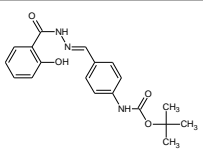   |
| 355906;WT-III-101-I_G09 | 27.57     | <chem>Oc1cccc1C(=O)N/N=C/c2ccccc2</chem>                                                                     |    |
| 355891;WT-III-101-I_F01 | 27.57     | <chem>COC1CCCC(OC)c1/C=N/NC(=O)c2ccccc2O</chem>                                                              |    |
| 355908;WT-III-101-I_G11 | 27.65     | <chem>Oc1cccc(/C=N/NC(=O)c2ccccc2O)c1</chem>                                                                 |    |
| (-)-Terreic Acid        | 28.63     | <chem>CC1C(=O)[C@@H]2O[C@@H]2C(=O)C1=O</chem>                                                                |   |
| 355915;WT-III-101-I_H07 | 28.98     | <chem>COC1cc(/C=C/C=N/NC(=O)c2ccccc2O)ccc1O</chem>                                                           |  |
| 8beta-HYDROXYCARAPIN    | 29.33     | <chem>COC(=O)C[C@H]1C(C)(C)C(=O)[C@@H]2C[C@]3(O)C(CC[C@@]4(C)[C@@H](OC(=O)C=C43)c5ccoc5)[C@@]1(C)C2=O</chem> |  |
| NPPB                    | 30.42     | <chem>OC(=O)c1cc(ccc1NCCCc2ccccc2)[N+](=O)[O-]</chem>                                                        |  |
| 355885;WT-III-101-I_E06 | 30.63     | <chem>Oc1cccc1C(=O)N/N=C/c2ccc3OCCc3c2</chem>                                                                |  |
| 355876;WT-III-101-I_D07 | 30.96     | <chem>Oc1cccc1C(=O)N/N=C/c2ccc(C#N)cc2</chem>                                                                |  |



| Compound Name            | EC50 (μM) | SMILES                                                               | Structure |
|--------------------------|-----------|----------------------------------------------------------------------|-----------|
| 355874;WT-III-101-I_D05  | 31.08     | <chem>C[C@H](CCC=C(C)C)C/C=N/NC(=O)c1ccccc1O</chem>                  |           |
| 355981;WT-III-101-I_XG11 | 32.00     | <chem>CCn1c2ccccc2c3cc(/C=N/NC(=O)c4ccccc4O)ccc13</chem>             |           |
| 355958;WT-III-101-I_XD09 | 32.22     | <chem>CC1=C(C/C=N/NC(=O)c2ccc(C)cc2O)C(C)(C)CCC1</chem>              |           |
| 355863;WT-III-101-I_C03  | 32.65     | <chem>COc1cc(/C=N/NC(=O)c2ccc(O)c(Br)cc2O)c1O</chem>                 |           |
| 355894;WT-III-101-I_F05  | 32.93     | <chem>CC1(C)COC(CCC/C=N/NC(=O)c2ccc(O)c1)OC1</chem>                  |           |
| 355892;WT-III-101-I_F02  | 33.15     | <chem>COc1ccc(/C=N/NC(=O)c2ccc(O)c1OC)cc2O</chem>                    |           |
| 355911;WT-III-101-I_H02  | 34.37     | <chem>OCCOc1ccc(/C=N/NC(=O)c2ccc(O)c1)cc2O</chem>                    |           |
| 355949;WT-III-101-I_XC11 | 34.53     | <chem>CCCCCCC/C=N/NC(=O)c1ccccc1O</chem>                             |           |
| 355967;WT-III-101-I_XF05 | 34.53     | <chem>OC[C@H](O)[C@H](O)[C@H](O)[C@H](O)C/C=N/NC(=O)c1ccccc1O</chem> |           |
| 355907;WT-III-101-I_G10  | 36.12     | <chem>Oc1ccccc1C(=O)N/N=C/c2ccc(O)c1</chem>                          |           |

| Compound Name            | EC50 (μM) | SMILES                                                                  | Structure |
|--------------------------|-----------|-------------------------------------------------------------------------|-----------|
| 356044;WT-III-101-II_E09 | 36.24     | <chem>Oc1ccc(O)c(/C=N/NC(=O)c2ccccc2)c1</chem>                          |           |
| 355937;WT-III-101-I_XB07 | 37.03     | <chem>COc1cc(/C=N/NC(=O)c2ccccc2O)c(cc1OC)[N+](=O)[O-]</chem>           |           |
| 355985;WT-III-101-I_XH03 | 37.29     | <chem>Oc1ccccc1C(=O)N/N=C/c2ccccc2n(Cc3ccccc3)c4ccccc24</chem>          |           |
| 356045;WT-III-101-II_E10 | 37.90     | <chem>Oc1ccc(/C=N/NC(=O)c2ccccc2n2)cc1O</chem>                          |           |
| 355852;WT-III-101-I_B01  | 38.68     | <chem>Oc1ccccc1C(=O)N/N=C/c2ccccc2c(Br)o2</chem>                        |           |
| 356058;WT-III-101-II_G03 | 38.77     | <chem>Oc1ccc(F)cc1/C=N/NC(=O)c2ccccc2n2</chem>                          |           |
| 355895;WT-III-101-I_F06  | 38.81     | <chem>Cc1nnc(Sc2ccc(/C=N/NC(=O)c3ccccc3O)o2)n1C</chem>                  |           |
| 355959;WT-III-101-I_XD11 | 38.94     | <chem>NC(=O)COc1ccccc1/C=N/NC(=O)c2ccccc2O</chem>                       |           |
| 355987;WT-III-101-I_XH05 | 39.30     | <chem>OC[C@@H](O)[C@@H](O)[C@H](O)[C@H](O)/C=N/NC(=O)c1ccccc1O</chem>   |           |
| Akt Inhibitor II         | 39.94     | <chem>CCCCCCCCCCCCCCCCCOC[C@H](COP(=O)(O)OC1C(O)C(O)C(O)CC1OC)OC</chem> |           |

| Compound Name                   | EC50 (μM) | SMILES                                                                                   | Structure |
|---------------------------------|-----------|------------------------------------------------------------------------------------------|-----------|
| 355868;WT-III-101-I_C10         | 40.02     | <chem>OC(=O)c1cccc(/C=N/NC(=O)c2ccccc2O)c1</chem>                                        |           |
| 5alpha-CHOLESTAN-3beta-OL-6-ONE | 40.13     | <chem>CC(C)CCCC(C)C1CCC2C3CC(=O)[C@H]4C[C@@H](O)CC[C@]4(C)C3CC[C@]12C</chem>             |           |
| 355872;WT-III-101-I_D03         | 41.14     | <chem>Oc1cccc1C(=O)N/N=C/c2ccccnc2Cl</chem>                                              |           |
| 355942;WT-III-101-I_XC02        | 41.30     | <chem>Oc1cccc1C(=O)N/N=C/c2ccccn(c3ccccc23)S(=O)(=O)c4cccc4</chem>                       |           |
| CHLORAMBUCIL                    | 41.45     | <chem>OC(=O)CCCc1ccc(cc1)N(CCCl)CCCl</chem>                                              |           |
| 355975;WT-III-101-I_XG03        | 41.56     | <chem>O[C@@H](/C=N/NC(=O)c1cccc1O)[C@@H](O)[C@@H](O)[C@H](O)C(=O)O</chem>                |           |
| 355854;WT-III-101-I_B03         | 42.53     | <chem>Oc1ccc(Br)c(/C=N/NC(=O)c2ccccc2O)c1</chem>                                         |           |
| SECURININE                      | 42.80     | <chem>O=C1O[C@]2(C[C@H]3C=CC2=C1)[C@H]4CCCCN34</chem>                                    |           |
| beta-AMYRIN                     | 42.88     | <chem>CC1(C)CC[C@]2(C)CC[C@]3(C)C(=CCC4[C@@]5(C)CC[C@H](O)C(C)(C)C5CC[C@]43C)C2C1</chem> |           |
| 355862;WT-III-101-I_C02         | 44.36     | <chem>Oc1cccc1C(=O)N/N=C/c2cc(Br)s2</chem>                                               |           |

| Compound Name             | EC50 (μM) | SMILES                                                               | Structure                                                                             |
|---------------------------|-----------|----------------------------------------------------------------------|---------------------------------------------------------------------------------------|
| 355857;WT-III-101-I_B07   | 44.46     | <chem>COc1ccc(Br)cc1/C=N/NC(=O)c2ccccc2O</chem>                      | 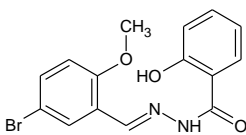   |
| 5920592                   | 45.28     | <chem>COc1ccc2nc(Sc3c(nc(C)n3Cc4ccccc4)[N+](=O)[O-])[nH]c2c1</chem>  |    |
| 355962;WT-III-101-I_XE08  | 48.20     | <chem>Oc1ccccc1C(=O)N/N=C/c2ccc(cc2)N(c3ccccc3)c4ccccc4</chem>       |    |
| 356137;WT-III-101-II_XG11 | 48.96     | <chem>CCn1c2ccccc2c3cc(/C=N/NC(=O)c4ccccc4)ccc13</chem>              |    |
| 355901;WT-III-101-I_G02   | 49.19     | <chem>Oc1ccccc1C(=O)N/N=C/c2ccc(cc2F)c(Oc3ccccc3)c2</chem>           |   |
| 355969;WT-III-101-I_XF07  | 50.28     | <chem>C[C@H](O)[C@H](O)[C@@H](O)[C@@H](O)/C=N/NC(=O)c1ccccc1O</chem> |   |
| 355944;WT-III-101-I_XC04  | 51.67     | <chem>Oc1ccccc1C(=O)N/N=C/c2cccnc2</chem>                            |  |
| MELPHALAN                 | 52.01     | <chem>N[C@@H](Cc1ccc(cc1)N(CCCl)CCCl)C(=O)O</chem>                   |  |
| 355897;WT-III-101-I_F09   | 54.22     | <chem>CC(C)(C)OC(=O)NC/C=N/NC(=O)c1ccccc1O</chem>                    |   |
| TFB14-I082                | 54.26     | <chem>CC(=O)n1cc(/C=C/C(=O)C(=O)OCC=C)c2ccccc12</chem>               |  |

| Compound Name            | EC50 (μM) | SMILES                                                           | Structure |
|--------------------------|-----------|------------------------------------------------------------------|-----------|
| 355865;WT-III-101-I_C06  | 54.72     | <chem>CC(C)(C)OC(=O)NC1(CCC1)/C=N/NC(=O)c2ccccc2O</chem>         |           |
| ICRF-193                 | 55.83     | <chem>C[C@@H]([C@@H](C)N1C(=O)NC(=O)C1)N2CC(=O)NC(=O)C2</chem>   |           |
| 355995;WT-III-101-I_XE07 | 60.10     | <chem>Oc1ccccc1C(=O)N/N=C/c2ccc3ccccc3n2S(=O)(=O)c4ccccc4</chem> |           |
| DML-I-127-f10-17         | 61.98     | <chem>C=CCOC(=O)C(=O)/C=C/C1CC1</chem>                           |           |
| GENISTEIN                | 62.12     | <chem>Oc1ccc(cc1)c2coc3cc(O)cc(O)c3c2=O</chem>                   |           |
| genistein                | 63.15     | <chem>Cc1ccc(cc1)C2=CCc3cc(C)cc(C)c3C2=C</chem>                  |           |
| 355849;WT-III-101-I_A10  | 63.32     | <chem>Oc1ccccc1C(=O)N/N=C/c2ccc(Br)c2</chem>                     |           |
| 355893;WT-III-101-I_F03  | 63.89     | <chem>COc1cc(O)cc(OC)c1/C=N/NC(=O)c2ccccc2O</chem>               |           |
| 355883;WT-III-101-I_E04  | 66.29     | <chem>Oc1ccccc1C(=O)N/N=C/c2ccc(Br)cc([N+](=O)[O-])c2O</chem>    |           |
| 355864;WT-III-101-I_C04  | 69.23     | <chem>Oc1ccccc1C(=O)N/N=C/c2ccc(OCc3ccccc3)cc2O</chem>           |           |

| Compound Name                           | EC50 (μM) | SMILES                                                         | Structure                                                                             |
|-----------------------------------------|-----------|----------------------------------------------------------------|---------------------------------------------------------------------------------------|
| Syk Inhibitor                           | 72.50     | <chem>Cn1cc(/C=C/2\C(=O)Nc3ccc(cc23)S(=O)(=O)N)c4cccc14</chem> | 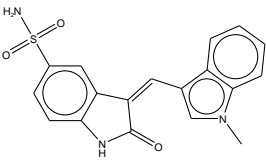   |
| Oleic Acid                              | 75.41     | <chem>CCCCCCCC/C=C\CCCCCCC(=O)O</chem>                         |    |
| AGL 2263                                | 76.45     | <chem>Oc1ccc(cc1O)C(=O)/C=C/c2ccc3oc(=O)[nH]c3c2)/C#N</chem>   |    |
| VEGF Receptor 3 Kinase Inhibitor, MAZ51 | 78.41     | <chem>CN(C)c1ccc(/C=C/2\C(=O)Nc3ccccc23)c4ccccc14</chem>       |    |
| TFB26-I096                              | 78.77     | <chem>C=CCOC(=O)C(=O)/C=C/c1cc2cccc2c1=O</chem>                |   |
| 355912;WT-III-101-I_H03                 | 81.66     | <chem>OCCOc1ccc(/C=N/NC(=O)c2ccccc2O)cc1</chem>                |  |
| 355936;WT-III-101-I_XB05                | 81.69     | <chem>Oc1ccccc1C(=O)N/N=C/c2ccccc2[N+](=O)[O-]</chem>          |  |
| 355869;WT-III-101-I_C11                 | 83.82     | <chem>OC(=O)c1ccccc1/C=N/NC(=O)c2ccccc2O</chem>                |  |
| 355881;WT-III-101-I_E01                 | 88.09     | <chem>COc1cc(Cl)c(/C=N/NC(=O)c2ccccc2O)c(Cl)c1OC</chem>        |  |
| 355873;WT-III-101-I_D04                 | 88.85     | <chem>Oc1ccccc1C(=O)N/N=C/C=C/c2ccccc2</chem>                  |  |

| Compound Name            | EC50 (μM) | SMILES                                                                                                  | Structure                                                                             |
|--------------------------|-----------|---------------------------------------------------------------------------------------------------------|---------------------------------------------------------------------------------------|
| L-744,832                | 89.00     | <chem>CC[C@@H](C)[C@@H](CO[C@@H](Cc1ccccc1)C(=O)N[C@@H](CCS(=O)=O)C)C(=O)OC(C)NCC(N)CS</chem>           | 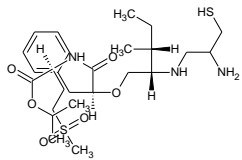   |
| NP-006884                | 90.83     | <chem>OC[C@H]1O[C@@H](Oc2ccc(C=C)cc2O[C@@H]3O[C@@H](CO)[C@@H](O)[C@H](O)[C@H]3O)[C@H](O)[C@@H]1O</chem> |    |
| 355938;WT-III-101-I_XB09 | 91.91     | <chem>Oc1ccccc1C(=O)N/N=C/c2cc(F)c(F)c(F)c(F)c2F</chem>                                                 |    |
| Butein                   | 91.99     | <chem>Oc1ccc(C(=O)/C=C/c2ccc(O)c(O)c2)c(O)c1</chem>                                                     |    |
| NP-001236                | 92.31     | <chem>CCC(C)C(=O)OC1CC(C)C=C2C=CC(C)C(CCC(O)CC(O)CC(=O)O)C12</chem>                                     |   |
| TMI-34                   | 93.03     | <chem>CC(C)Cc1ccc(CN2CC[C@@H](N)C2)cc1</chem>                                                           |  |
| HUM-SAH20                | 94.90     | <chem>COc1cc(CO)cc(I)c1O[C@H]2C=C(C[C@@H](NCCc3c[nH]c4ccccc34)[C@@H]2O)C(=O)NCCO</chem>                 |  |
| 355963;WT-III-101-I_XE09 | 95.02     | <chem>Oc1ccccc1C(=O)N/N=C/C[P+](c2ccccc2)(c3ccccc3)c4ccccc4</chem>                                      |  |
| 355900;WT-III-101-I_G01  | 96.51     | <chem>Oc1ccc(/C=N/NC(=O)c2ccc(O)c(F)c2)cc1</chem>                                                       |  |
|                          |           |                                                                                                         |                                                                                       |
